# Supplementary material for: Ethylene glycol assisted self-template conversion approach to synthesize hollow NiS microspheres for a high performance all-solid-state supercapacitor
Source: Royal Society of Chemistry journal article supplement (doi:10.1039/d1qm01253c), 2021-11-19
Supplement: d1qm01253c1.pdf [file d1qm01253c1.pdf]

## Supporting Information

### Ethylene glycol assisted self-template conversion approach to synthesize hollow NiS microspheres for a high performance all-solid-state supercapacitor

Maiyong Zhu\*, Xuan Li, Chengyu Tu, Qiao Luo, Yijing Nie, Jianmei  
Pan\*, Songjun Li\*

Research School of Polymeric Materials, School of Materials Science &  
Engineering, Jiangsu University, Zhenjiang, 212013, P. R. China

Corresponding authors: [mai Yongzhu@ujs.edu.cn](mailto:mai Yongzhu@ujs.edu.cn); [jmpanc@163.com](mailto:jmpanc@163.com);  
[lsjchem@ujs.edu.cn](mailto:lsjchem@ujs.edu.cn)

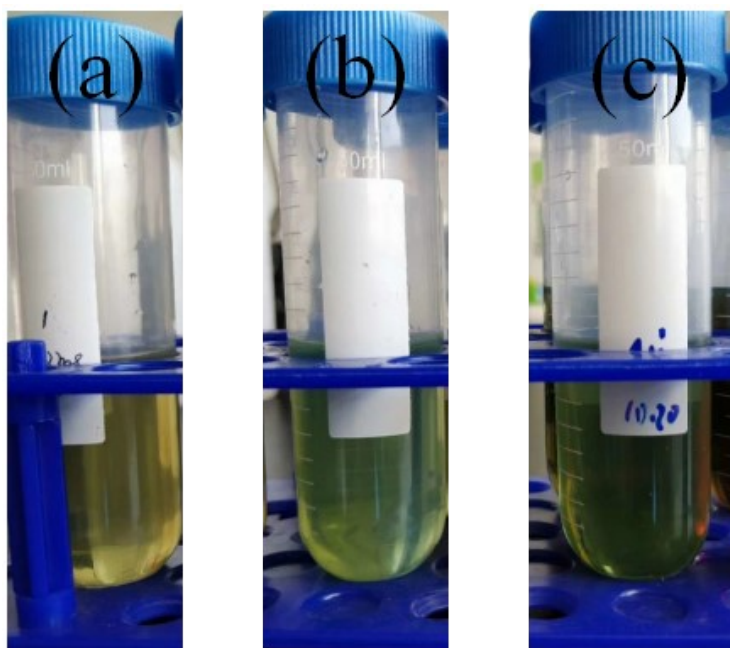

**Figure S1. Optical photographs of different solutions after solvothermal reaction using different amount of  $\text{Ni}(\text{NO}_3)_2 \cdot 6\text{H}_2\text{O}$  as nickel resource. (a) low amount, (b) moderate amount, and (c) high amount.**

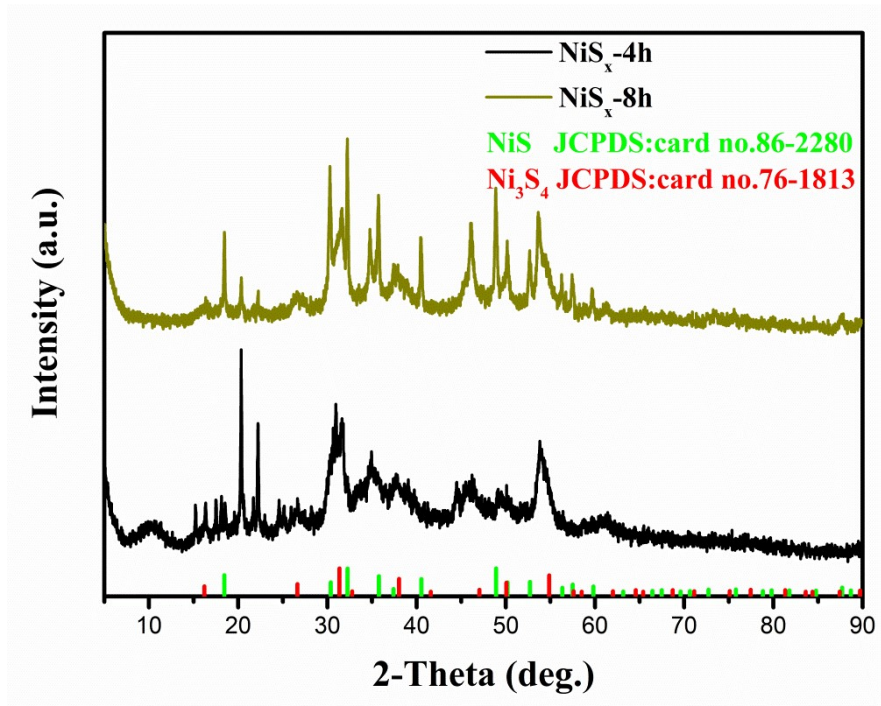

Figure S2. XRD patterns of different vulcanization time of NiS<sub>x</sub>

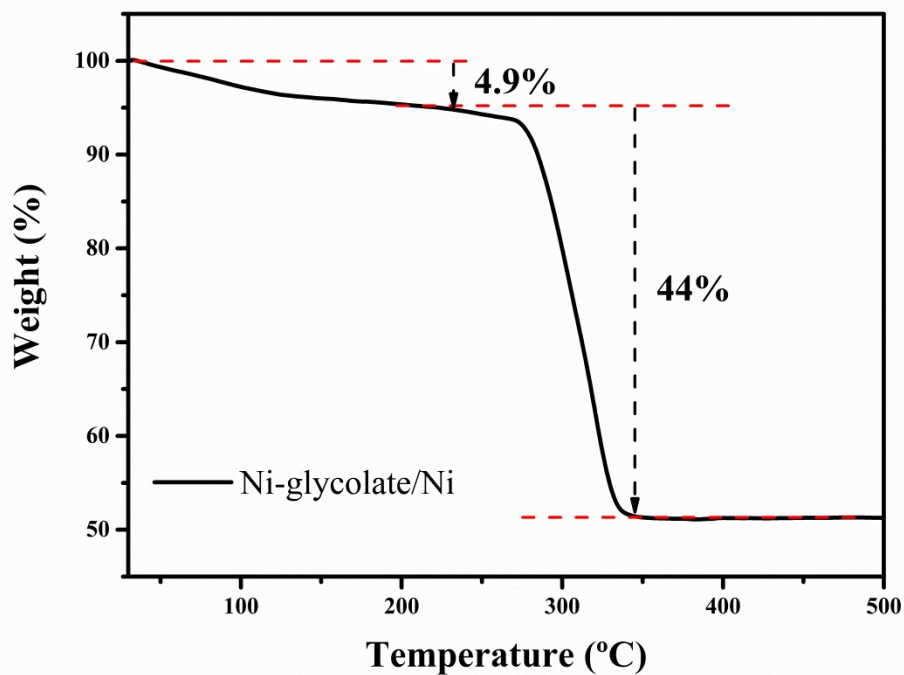

Figure S3. TGA curve of Ni-glycolate/Ni.

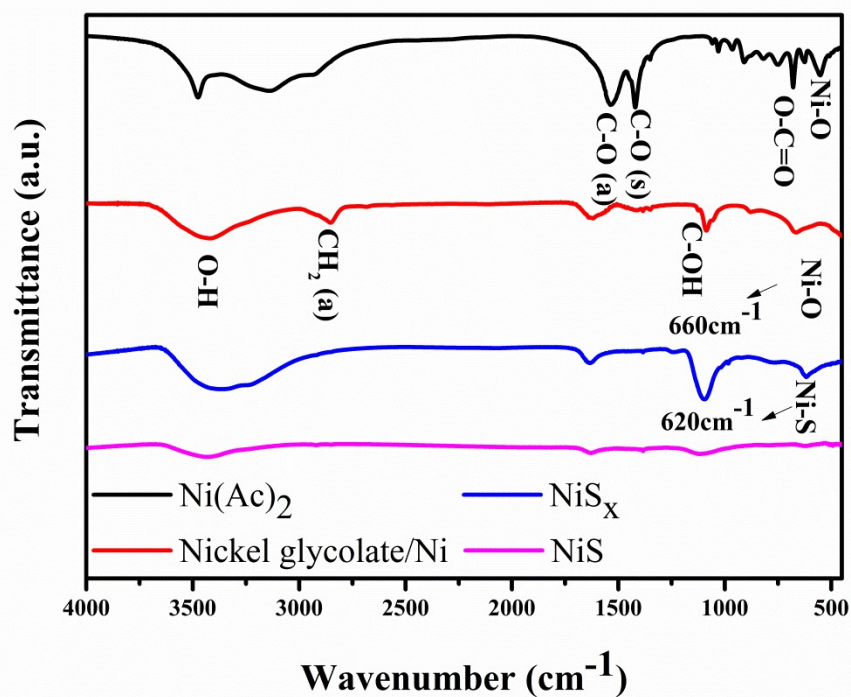

Figure S4. FT-IR spectra of Ni(Ac)<sub>2</sub>, Ni-glycolate/Ni, NiS<sub>x</sub> and NiS.

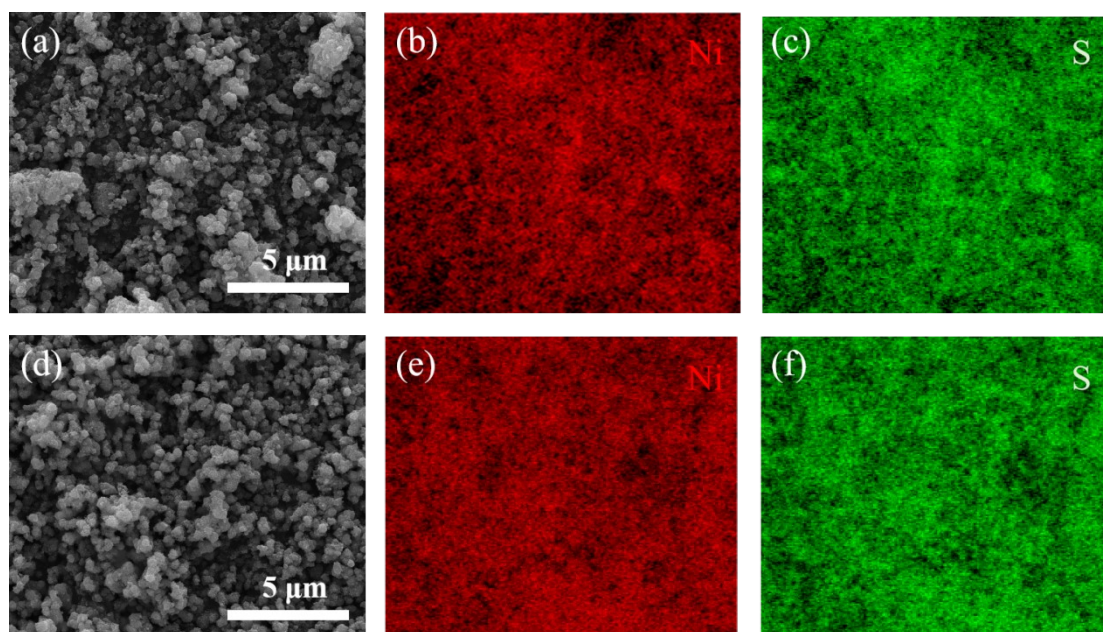

Figure S5. SEM images of (a) NiS, (b–c) EDS mapping of NiS<sub>x</sub>, (d) NiS, (e–f) EDS mapping of NiS.

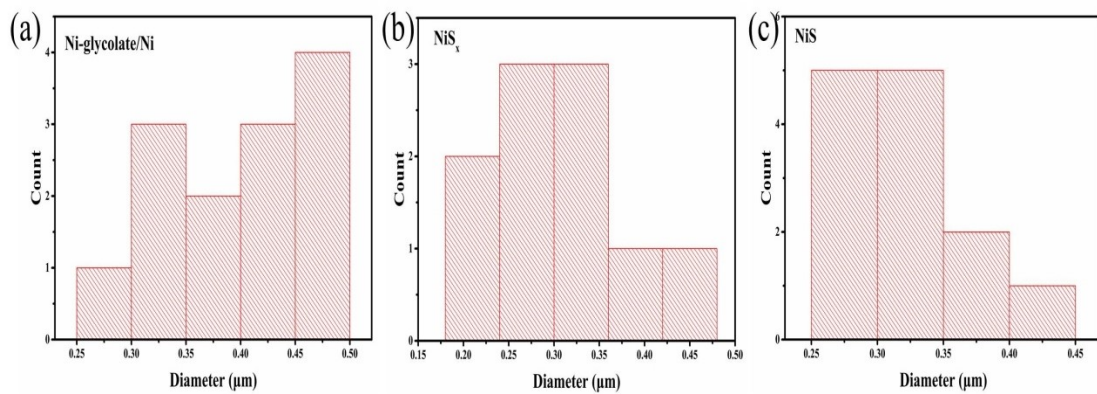

**Figure S6. Diameter distribution of Ni-glycolate/Ni, (b) NiS<sub>x</sub>, (c) NiS.**

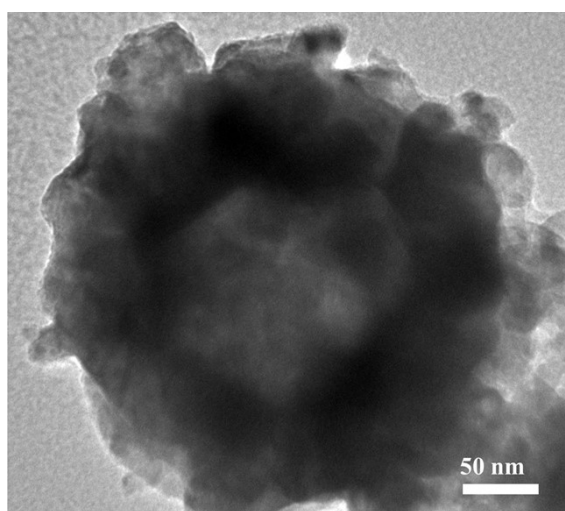

**Figure S7. TEM image of an individual NiS hollow microsphere.**

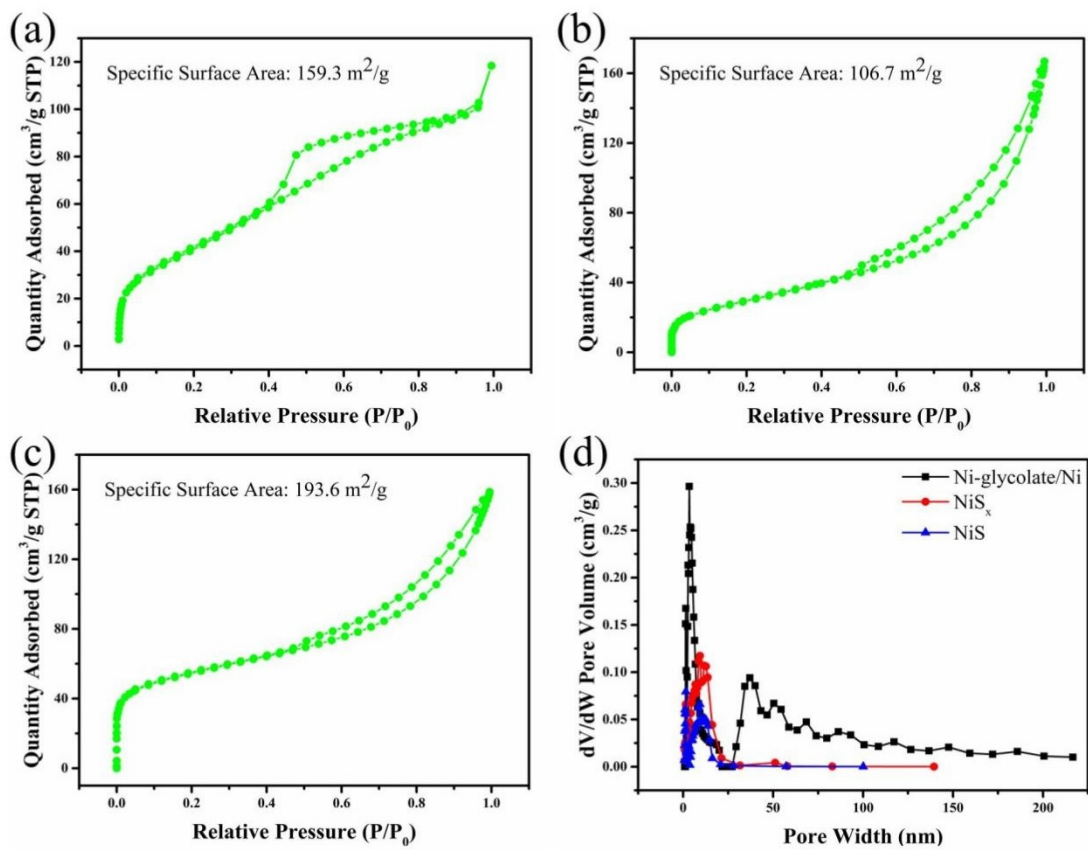

**Figure S8. Nitrogen adsorption-desorption isotherms of (a) Ni-glycolate/Ni, (b)  $\text{NiS}_x$ , (c) NiS and (d) their corresponding pore size distributions.**

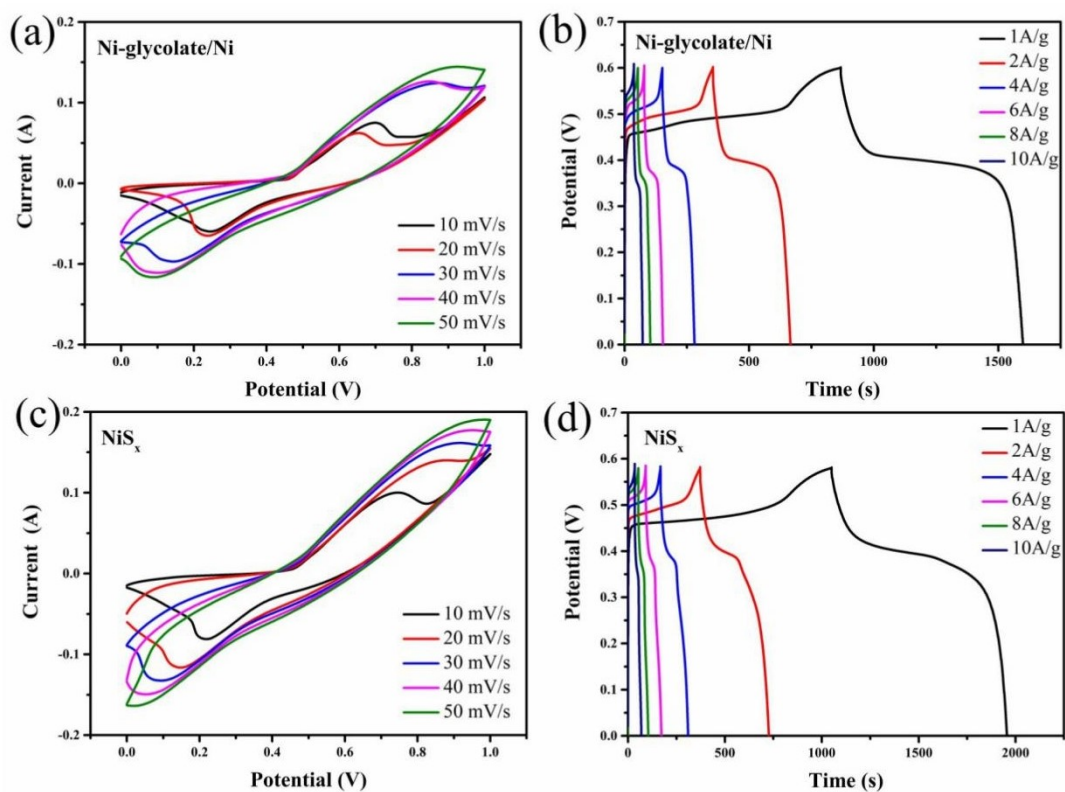

Figure S9. (a) CV curves of Ni-glycolate/Ni, (b) GCD curves of Ni-glycolate/Ni, (c) CV curves of NiS<sub>x</sub> and (d) GCD curves of NiS<sub>x</sub>.

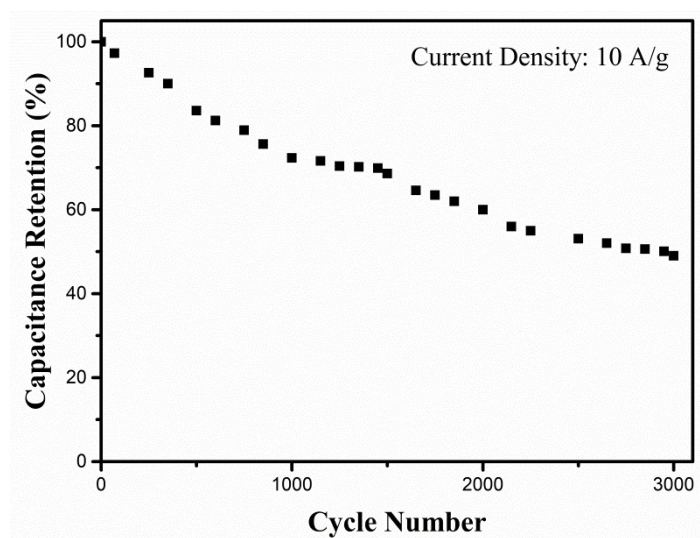

Figure S10. Cycling stability of NiS.

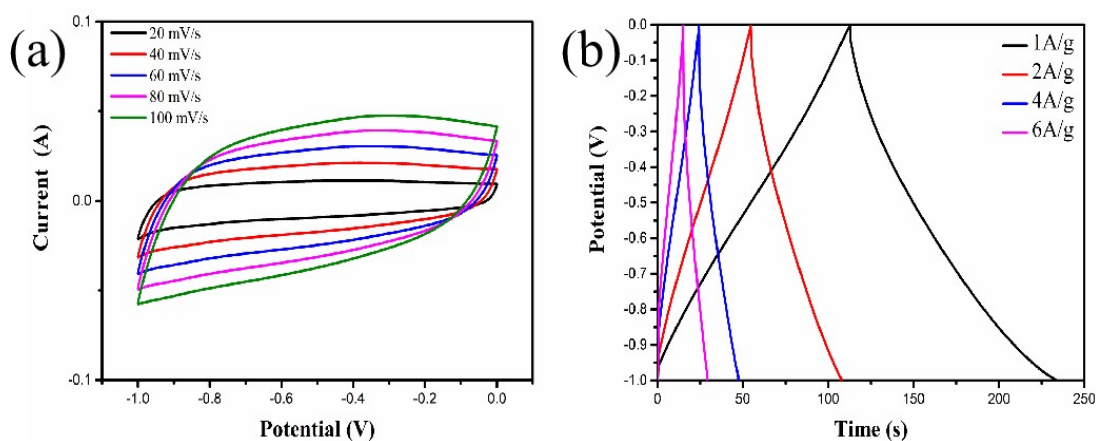

Figure S11. (a) CV curves of AC, (b) GCD curves of AC.

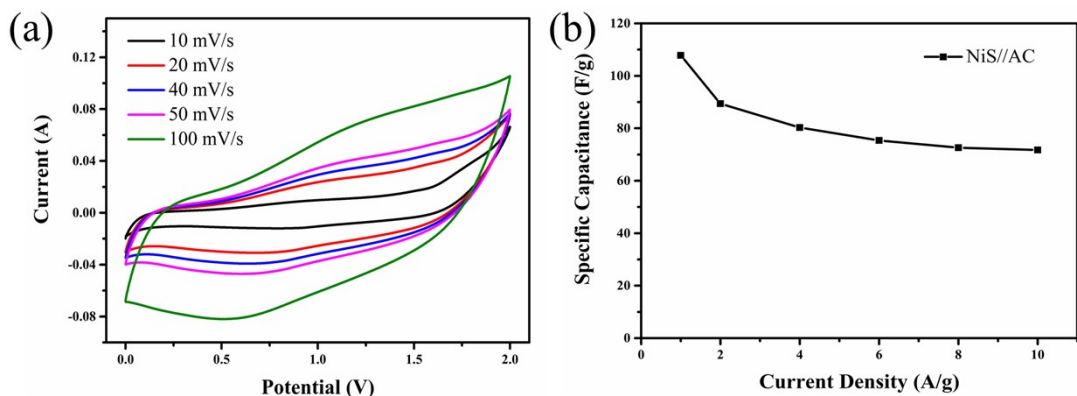

Figure S12. (a) CV profiles of NiS//AC at various sweep rates, (b) the calculated capacitances of the hybrid supercapacitor at 1–10 A/g.

Table S1. Components of the Equivalent Circuit Fitted for the Impedance Spectra

| sample           | $R_s$ ( $\Omega$ ) | $R_{ct}$ ( $\Omega$ ) | $Z_w$ ( $\Omega$ ) |
|------------------|--------------------|-----------------------|--------------------|
| Ni-glycolate/Ni  | 2.06               | 0.86                  | 0.41               |
| NiS <sub>x</sub> | 1.88               | 0.85                  | 0.51               |
| NiS              | 1.63               | 0.13                  | 0.43               |
